# Supplementary material for: Genomic Insights into Virulence Factors and Multi-Drug Resistance in Clostridium perfringens IRMC2505A
Source: MDPI journal article supplement (doi:10.3390/toxins15060359), 2023-05-25
Supplement: s1 [file s1]

## Genomic Insights into Virulence Factors and Multi-Drug Resistance in *Clostridium perfringens* IRLC2505A

**Supplementary Table S1:** Assembly Details and annotated features of *Clostridium perfringens* IRLC2505A.

| General Info           |                                          |
|------------------------|------------------------------------------|
| Genome Name            | <i>Clostridium perfringens</i> IRLC2505A |
| Taxonomy Info          |                                          |
| Taxon ID               | <a href="#">1502</a>                     |
| Superkingdom           | Bacteria                                 |
| Phylum                 | Firmicutes                               |
| Class                  | Clostridia                               |
| Order                  | Eubacteriales                            |
| Family                 | Clostridiaceae                           |
| Genus                  | <i>Clostridium</i>                       |
| Species                | <i>Clostridium perfringens</i>           |
| Status                 |                                          |
| Genome Status          | WGS                                      |
| Genome Statistics      |                                          |
| Contigs                | 108                                      |
| Genome Length          | 4322225                                  |
| GC Content             | 28.275791                                |
| Contig L50             | 15                                       |
| Contig N50             | 91957                                    |
| Annotation Statistics  |                                          |
| tRNA                   | 80                                       |
| rRNA                   | 7                                        |
| CDS                    | 4159                                     |
| CDS Ratio              | 0.96223587                               |
| Hypothetical CDS       | 1411                                     |
| Hypothetical CDS Ratio | 0.4308728                                |

|                       |           |
|-----------------------|-----------|
| PLFAM CDS             | 3608      |
| PLFAM CDS Ratio       | 0.8675162 |
| <b>Genome Quality</b> |           |
| Coarse Consistency    | 99.6      |
| Fine Consistency      | 94.5      |
| CheckM Completeness   | 99.9      |
| CheckM Contamination  | 12.3      |
| Genome Quality        | Good      |

**Supplementary Table S2:** List of antimicrobial resistance genes identified in the genome of *Clostridium perfringens* IRLC2505A.

|    | Source | Gene            | Product/Function                                               | Classification                                                        | Subject Coverage | Query Coverage | Identity | E-value* |
|----|--------|-----------------|----------------------------------------------------------------|-----------------------------------------------------------------------|------------------|----------------|----------|----------|
| 1  | PATRIC | <i>EF-G</i>     | Translation elongation factor G                                | antibiotic target in susceptible species                              |                  |                |          |          |
| 2  | NDARO  | <i>TetB(P)</i>  | Tetracycline resistance, ribosomal protection type => TetB(P)  |                                                                       | 13               | 91             | 95       | 5e-40    |
| 3  | PATRIC | <i>S12p</i>     | SSU ribosomal protein S12p (S23e)                              | antibiotic target in susceptible species                              |                  |                |          |          |
| 4  | PATRIC | <i>EF-Tu</i>    | Translation elongation factor Tu                               | antibiotic target in susceptible species                              |                  |                |          |          |
| 5  | PATRIC | <i>TetB(P)</i>  | Tetracycline resistance, ribosomal protection type => TetB(P)  | antibiotic target protection protein                                  |                  |                |          |          |
| 6  | PATRIC | <i>MurA</i>     | UDP-N-acetylglucosamine 1-carboxyvinyltransferase (EC 2.5.1.7) | antibiotic target in susceptible species                              |                  |                |          |          |
| 7  | PATRIC | <i>Alr</i>      | Alanine racemase (EC 5.1.1.1)                                  | antibiotic target in susceptible species                              |                  |                |          |          |
| 8  | PATRIC | <i>TetB(P)</i>  | Tetracycline resistance, ribosomal protection type => TetB(P)  | antibiotic target protection protein                                  |                  |                |          |          |
| 9  | PATRIC | <i>gidB</i>     | 16S rRNA (guanine(527)-N(7))-methyltransferase (EC 2.1.1.170)  | gene conferring resistance via absence                                |                  |                |          |          |
| 10 | PATRIC | <i>gyrB</i>     | DNA gyrase subunit B (EC 5.99.1.3)                             | antibiotic target in susceptible species                              |                  |                |          |          |
| 11 | PATRIC | <i>Iso-tRNA</i> | Isoleucyl-tRNA synthetase (EC 6.1.1.5)                         | antibiotic target in susceptible species                              |                  |                |          |          |
| 12 | PATRIC | <i>Alr</i>      | Alanine racemase (EC 5.1.1.1)                                  | antibiotic target in susceptible species                              |                  |                |          |          |
| 13 | CARD   | <i>EF-Tu</i>    | Translation elongation factor Tu                               | antibiotic resistant gene variant or mutant,elfamycin resistance gene | 6                | 96             | 83       | 7e-03    |

|    |        |                  |                                                                                             |                                                                       |     |     |     |        |
|----|--------|------------------|---------------------------------------------------------------------------------------------|-----------------------------------------------------------------------|-----|-----|-----|--------|
| 14 | PATRIC | <i>EF-Tu</i>     | Translation elongation factor Tu                                                            | antibiotic target in susceptible species                              |     |     |     |        |
| 15 | NDARO  | <i>TetA(P)</i>   | Tetracycline resistance, MFS efflux pump => TetA(P)                                         |                                                                       | 100 | 100 | 100 | 1e-237 |
| 16 | PATRIC | <i>FabK-like</i> | Putative FabK-like enoyl-[acyl-carrier-protein] reductase                                   | protein involved in antibiotic sequestration                          |     |     |     |        |
| 17 | CARD   | <i>mprF</i>      | putative membrane protein                                                                   | antibiotic target modifying enzyme,peptide antibiotic resistance gene | 100 | 100 | 95  | 0.0    |
| 18 | PATRIC | <i>NimB</i>      | Nitroimidazole resistance protein NimB                                                      | antibiotic inactivation enzyme                                        |     |     |     |        |
| 19 | PATRIC | <i>gyrB</i>      | DNA gyrase subunit B (EC 5.99.1.3)                                                          | antibiotic target in susceptible species                              |     |     |     |        |
| 20 | PATRIC | <i>TetB(P)</i>   | Tetracycline resistance, ribosomal protection type => TetB(P)                               | antibiotic target protection protein                                  |     |     |     |        |
| 21 | PATRIC | <i>S10p</i>      | SSU ribosomal protein S10p (S20e)                                                           | antibiotic target in susceptible species                              |     |     |     |        |
| 22 | PATRIC | <i>GdpD</i>      | Glycerophosphoryl diester phosphodiesterase (EC 3.1.4.46)                                   | protein altering cell wall charge conferring antibiotic resistance    |     |     |     |        |
| 23 | PATRIC | <i>kasA</i>      | 3-oxoacyl-[acyl-carrier-protein] synthase, KASII (EC 2.3.1.179)                             | antibiotic target in susceptible species                              |     |     |     |        |
| 24 | CARD   | <i>tetA(P)</i>   | Tetracycline resistance, MFS efflux pump => TetA(P)                                         | efflux pump conferring antibiotic resistance                          | 100 | 100 | 98  | 1e-234 |
| 25 | PATRIC | <i>fabV</i>      | Enoyl-[acyl-carrier-protein] reductase [NADH] (EC 1.3.1.9), FabV => refractory to triclosan | antibiotic target replacement protein                                 |     |     |     |        |
| 26 | PATRIC | <i>MurA</i>      | UDP-N-acetylglucosamine 1-carboxyvinyltransferase (EC 2.5.1.7)                              | antibiotic target in susceptible species                              |     |     |     |        |
| 27 | CARD   | <i>EF-Tu</i>     | Translation elongation factor Tu                                                            | antibiotic resistant gene variant or                                  | 6   | 96  | 83  | 7e-03  |

|    |        |                |                                                                                        |                                                                          |    |    |    |        |
|----|--------|----------------|----------------------------------------------------------------------------------------|--------------------------------------------------------------------------|----|----|----|--------|
|    |        |                |                                                                                        | mutant,elfamycin<br>resistance gene                                      |    |    |    |        |
| 28 | CARD   | <i>tetB(P)</i> | Tetracycline resistance, ribosomal<br>protection type => TetB(P)                       | antibiotic target protection<br>protein,tetracycline<br>resistance gene  | 48 | 99 | 98 | 1e-180 |
| 29 | PATRIC | <i>TetA(P)</i> | Tetracycline resistance, MFS efflux<br>pump => TetA(P)                                 | efflux pump conferring<br>antibiotic resistance                          |    |    |    |        |
| 30 | PATRIC | <i>dxr</i>     | 1-deoxy-D-xylulose 5-phosphate<br>reductoisomerase (EC 1.1.1.267)                      | antibiotic target in<br>susceptible species                              |    |    |    |        |
| 31 | PATRIC | <i>MprF</i>    | L-O-lysylphosphatidylglycerol synthase<br>(EC 2.3.2.3)                                 | protein altering cell wall<br>charge conferring<br>antibiotic resistance |    |    |    |        |
| 32 | NDARO  | <i>TetB(P)</i> | Tetracycline resistance, ribosomal<br>protection type => TetB(P)                       |                                                                          | 48 | 99 | 98 | 1e-180 |
| 33 | PATRIC | <i>rho</i>     | Transcription termination factor Rho                                                   | antibiotic target in<br>susceptible species                              |    |    |    |        |
| 34 | PATRIC | <i>gyrA</i>    | DNA gyrase subunit A (EC 5.99.1.3)                                                     | antibiotic target in<br>susceptible species                              |    |    |    |        |
| 35 | PATRIC | <i>GdpD</i>    | Glycerophosphoryl diester<br>phosphodiesterase (EC 3.1.4.46)                           | protein altering cell wall<br>charge conferring<br>antibiotic resistance |    |    |    |        |
| 36 | PATRIC | <i>PgsA</i>    | CDP-diacylglycerol--glycerol-3-<br>phosphate 3-phosphatidyltransferase (EC<br>2.7.8.5) | protein altering cell wall<br>charge conferring<br>antibiotic resistance |    |    |    |        |
| 37 | PATRIC | <i>gidB</i>    | 16S rRNA (guanine(527)-N(7))-<br>methyltransferase (EC 2.1.1.170)                      | gene conferring resistance<br>via absence                                |    |    |    |        |
| 38 | PATRIC | <i>gyrA</i>    | DNA gyrase subunit A (EC 5.99.1.3)                                                     | antibiotic target in<br>susceptible species                              |    |    |    |        |
| 39 | PATRIC | <i>rpoC</i>    | DNA-directed RNA polymerase beta'<br>subunit (EC 2.7.7.6)                              | antibiotic target in<br>susceptible species                              |    |    |    |        |
| 40 | PATRIC | <i>TetB(P)</i> | Tetracycline resistance, ribosomal<br>protection type => TetB(P)                       | antibiotic target protection<br>protein                                  |    |    |    |        |

|    |        |                  |                                                                |                                                                    |    |    |    |       |
|----|--------|------------------|----------------------------------------------------------------|--------------------------------------------------------------------|----|----|----|-------|
| 41 | PATRIC | <i>MurA</i>      | UDP-N-acetylglucosamine 1-carboxyvinyltransferase (EC 2.5.1.7) | antibiotic target in susceptible species                           |    |    |    |       |
| 42 | CARD   | <i>tetB(P)</i>   | Tetracycline resistance, ribosomal protection type => TetB(P)  | antibiotic target protection protein, tetracycline resistance gene | 13 | 91 | 95 | 5e-40 |
| 43 | PATRIC | <i>folP</i>      | Dihydropteroate synthase (EC 2.5.1.15)                         | antibiotic target in susceptible species                           |    |    |    |       |
| 44 | PATRIC | <i>Ddl</i>       | D-alanine--D-alanine ligase (EC 6.3.2.4)                       | antibiotic target in susceptible species                           |    |    |    |       |
| 45 | PATRIC | <i>Ddl</i>       | D-alanine--D-alanine ligase (EC 6.3.2.4)                       | antibiotic target in susceptible species                           |    |    |    |       |
| 46 | PATRIC | <i>Alr</i>       | Alanine racemase (EC 5.1.1.1)                                  | antibiotic target in susceptible species                           |    |    |    |       |
| 47 | PATRIC | <i>folA, Dfr</i> | Dihydrofolate reductase (EC 1.5.1.3)                           | antibiotic target in susceptible species                           |    |    |    |       |
| 48 | PATRIC | <i>rpoB</i>      | DNA-directed RNA polymerase beta subunit (EC 2.7.7.6)          | antibiotic target in susceptible species                           |    |    |    |       |

\*E-values were available only for CARD (Comprehensive Antibiotic Resistance Database) and NDARO (National Database of Antibiotic Resistant Organisms). PATRIC: Pathosystems Resource Integration Center.

**Supplementary Table S3: Functions and classifications of list of antimicrobial resistance genes in the genome of *C. perfringens* IIRC2505A.**

| Evidence     | Property              | Source   | Genome Name                       | BRIC ID               | RefSeq Tag | Alt Locus Tag | Source ID      | Source Organism                              | Gene      | Product                                                        | Function                                                                                                       | Classification                                                          | PubMed                    | Subject Coverage | Query Coverage | Identity | E-value |
|--------------|-----------------------|----------|-----------------------------------|-----------------------|------------|---------------|----------------|----------------------------------------------|-----------|----------------------------------------------------------------|----------------------------------------------------------------------------------------------------------------|-------------------------------------------------------------------------|---------------------------|------------------|----------------|----------|---------|
| BLAT         | Transporter           | TCDB     | Clostridium perfringens IIRC2505A | fig1502.2785.pcg.21   |            |               | Q08637         | Enterococcus hirae                           |           | V-type ATP synthase subunit B (EC 3.6.3.14)                    | the h <sup>+</sup> - or na <sup>+</sup> -translocating f-type, v-type and a-type atpase (f-atpase) superfamily | 3.A.2.2.2                                                               | 8144530;8157629;8373385   | 99               | 99             | 82       | 1e-222  |
| BLAT         | Virulence Factor      | Victors  | Clostridium perfringens IIRC2505A | fig1502.2785.pcg.824  |            |               | 15676067       | Neisseria meningitidis MC58                  | tufA      | Translation elongation factor Tu                               |                                                                                                                |                                                                         | 11062540                  | 5                | 92             | 86       | 3e-03   |
| K-mer Search | Antibiotic Resistance | PATRIC   | Clostridium perfringens IIRC2505A | fig1502.2785.pcg.3739 |            |               |                |                                              | EF-G      | Translation elongation factor G                                | Translation elongation factor G                                                                                | antibiotic target in susceptible species                                | 17980694                  |                  |                |          |         |
| BLAT         | Antibiotic Resistance | NDARO    | Clostridium perfringens IIRC2505A | fig1502.2785.pcg.3985 |            |               | WP_012478245.1 | Clostridium perfringens                      |           | Tetracycline resistance, ribosomal protection type => TetB(P)  | tetracycline resistance ribosomal protection protein TetB(P)                                                   |                                                                         |                           | 13               | 91             | 95       | 5e-40   |
| K-mer Search | Antibiotic Resistance | PATRIC   | Clostridium perfringens IIRC2505A | fig1502.2785.pcg.3737 |            |               |                |                                              | S12p      | SSU ribosomal protein S12p (S23e)                              | SSU ribosomal protein S12p (S23e)                                                                              | antibiotic target in susceptible species                                | 7934937                   |                  |                |          |         |
| K-mer Search | Antibiotic Resistance | PATRIC   | Clostridium perfringens IIRC2505A | fig1502.2785.pcg.3726 |            |               |                |                                              | EF-Tu     | Translation elongation factor Tu                               | Translation elongation factor Tu                                                                               | antibiotic target in susceptible species                                | 364475;9678602            |                  |                |          |         |
| BLAT         | Virulence Factor      | VFDB     | Clostridium perfringens IIRC2505A | fig1502.2785.pcg.1184 |            |               | VFG002285      | Clostridium perfringens ATCC 13124           | nanH      |                                                                |                                                                                                                | Exoenzyme,Carbohydrate-active enzyme,Sialidase                          |                           | 100              | 100            | 98       | 1e-226  |
| BLAT         | Drug Target           | TTD      | Clostridium perfringens IIRC2505A | fig1502.2785.pcg.824  |            |               | TTD02058       |                                              |           | Translation elongation factor Tu                               |                                                                                                                |                                                                         |                           | 5                | 88             | 86       | 3e-02   |
| K-mer Search | Antibiotic Resistance | PATRIC   | Clostridium perfringens IIRC2505A | fig1502.2785.pcg.3987 |            |               |                |                                              | TetB(P)   | Tetracycline resistance, ribosomal protection type => TetB(P)  | Tetracycline resistance, ribosomal protection type => TetB(P)                                                  | antibiotic target protection protein                                    | 8170402;11717269          |                  |                |          |         |
| K-mer Search | Antibiotic Resistance | PATRIC   | Clostridium perfringens IIRC2505A | fig1502.2785.pcg.624  |            |               |                |                                              | MurA      | UDP-N-acetylglucosamine 1-carboxyvinyltransferase (EC 2.5.1.7) | UDP-N-acetylglucosamine 1-carboxyvinyltransferase (EC 2.5.1.7)                                                 | antibiotic target in susceptible species                                | 8994972                   |                  |                |          |         |
| BLAT         | Transporter           | TCDB     | Clostridium perfringens IIRC2505A | fig1502.2785.pcg.2183 |            |               | P0C2E9         | Clostridium perfringens                      |           | Thiol-activated cytolyisin                                     | the thiol-activated cholesterol-dependent cytolyisin (cdc) family.                                             | 1.C.12.1.1                                                              |                           | 92               | 88             | 87       | 1e-243  |
| BLAT         | Drug Target           | DrugBank | Clostridium perfringens IIRC2505A | fig1502.2785.pcg.4032 |            |               | Q8XL08         | Clostridium perfringens (strain 13 / Type A) | nagJ      | Protein O-GlcNAcase (EC 3.2.1.169)                             | gamma-butyrolactone                                                                                            | Drug target                                                             |                           | 100              | 100            | 98       | 0.0     |
| K-mer Search | Antibiotic Resistance | PATRIC   | Clostridium perfringens IIRC2505A | fig1502.2785.pcg.1488 |            |               |                |                                              | Alr       | Alanine racemase (EC 5.1.1.1)                                  | Alanine racemase (EC 5.1.1.1)                                                                                  | antibiotic target in susceptible species                                | 19748470;24303782         |                  |                |          |         |
| K-mer Search | Antibiotic Resistance | PATRIC   | Clostridium perfringens IIRC2505A | fig1502.2785.pcg.3985 |            |               |                |                                              | TetB(P)   | Tetracycline resistance, ribosomal protection type => TetB(P)  | Tetracycline resistance, ribosomal protection type => TetB(P)                                                  | antibiotic target protection protein                                    | 8170402;11717269          |                  |                |          |         |
| K-mer Search | Antibiotic Resistance | PATRIC   | Clostridium perfringens IIRC2505A | fig1502.2785.pcg.3358 |            |               |                |                                              | gidB      | 16S rRNA (guanine(527)-N(7))-methyltransferase (EC 2.1.1.170)  | 16S rRNA (guanine(527)-N(7))-methyltransferase (EC 2.1.1.170)                                                  | gene conferring resistance via absence                                  | 17238915                  |                  |                |          |         |
| K-mer Search | Antibiotic Resistance | PATRIC   | Clostridium perfringens IIRC2505A | fig1502.2785.pcg.3344 |            |               |                |                                              | gyrB      | DNA gyrase subunit B (EC 5.99.1.3)                             | DNA gyrase subunit B (EC 5.99.1.3)                                                                             | antibiotic target in susceptible species                                | 21693461;22279180;9293187 |                  |                |          |         |
| BLAT         | Drug Target           | TTD      | Clostridium perfringens IIRC2505A | fig1502.2785.pcg.3726 |            |               | TTD02058       |                                              |           | Translation elongation factor Tu                               |                                                                                                                |                                                                         |                           | 5                | 88             | 86       | 3e-02   |
| K-mer Search | Antibiotic Resistance | PATRIC   | Clostridium perfringens IIRC2505A | fig1502.2785.pcg.1048 |            |               |                |                                              | Iso-rRNA  | Isoleucyl-tRNA synthetase (EC 6.1.1.5)                         | Isoleucyl-tRNA synthetase (EC 6.1.1.5)                                                                         | antibiotic target in susceptible species                                | 7929087                   |                  |                |          |         |
| K-mer Search | Antibiotic Resistance | PATRIC   | Clostridium perfringens IIRC2505A | fig1502.2785.pcg.1111 |            |               |                |                                              | Alr       | Alanine racemase (EC 5.1.1.1)                                  | Alanine racemase (EC 5.1.1.1)                                                                                  | antibiotic target in susceptible species                                | 19748470;24303782         |                  |                |          |         |
| BLAT         | Antibiotic Resistance | CARD     | Clostridium perfringens IIRC2505A | fig1502.2785.pcg.824  |            |               | WP_009887863.1 | Clostridium difficile                        |           | Translation elongation factor Tu                               |                                                                                                                | antibiotic resistant gene variant or mutant,clfrancycin resistance gene |                           | 6                | 96             | 83       | 7e-03   |
| BLAT         | Virulence Factor      | Victors  | Clostridium perfringens IIRC2505A | fig1502.2785.pcg.710  |            |               | 110801372      | Clostridium perfringens ATCC 13124           | virS      | hypothetical protein                                           |                                                                                                                |                                                                         | 8052128                   | 99               | 100            | 95       | 1e-243  |
| K-mer Search | Antibiotic Resistance | PATRIC   | Clostridium perfringens IIRC2505A | fig1502.2785.pcg.824  |            |               |                |                                              | EF-Tu     | Translation elongation factor Tu                               | Translation elongation factor Tu                                                                               | antibiotic target in susceptible species                                | 364475;9678602            |                  |                |          |         |
| BLAT         | Transporter           | TCDB     | Clostridium perfringens IIRC2505A | fig1502.2785.pcg.3983 |            |               | Q46305         | Clostridium perfringens                      |           | Tetracycline resistance, MFS efflux pump => TetA(P)            | the major facilitator superfamily (mfs).                                                                       | 2.A.1.21.6                                                              | 16788202;8170402          | 100              | 100            | 98       | 1e-234  |
| BLAT         | Antibiotic Resistance | NDARO    | Clostridium perfringens IIRC2505A | fig1502.2785.pcg.3983 |            |               | WP_003479690.1 | Clostridium perfringens                      |           | Tetracycline resistance, MFS efflux pump => TetA(P)            | tetracycline efflux MFS transporter TetA(P)                                                                    |                                                                         |                           | 100              | 100            | 100      | 1e-237  |
| BLAT         | Virulence Factor      | Victors  | Clostridium perfringens IIRC2505A | fig1502.2785.pcg.2183 |            |               | 18309145       | Clostridium perfringens str. 13              | pfoA      | Thiol-activated cytolyisin                                     |                                                                                                                |                                                                         | 9182756                   | 92               | 88             | 87       | 1e-243  |
| K-mer Search | Antibiotic Resistance | PATRIC   | Clostridium perfringens IIRC2505A | fig1502.2785.pcg.1362 |            |               |                |                                              | FabK-like | Putative FabK-like enoyl-[acyl-carrier-protein] reductase      | Putative FabK-like enoyl-[acyl-carrier-protein] reductase                                                      | protein involved in antibiotic sequestration                            | 27577999                  |                  |                |          |         |
| BLAT         | Virulence Factor      | Victors  | Clostridium perfringens IIRC2505A | fig1502.2785.pcg.3726 |            |               | 15676067       | Neisseria meningitidis MCS8                  | tufA      | Translation elongation factor Tu                               |                                                                                                                |                                                                         | 11062540                  | 5                | 92             | 86       | 3e-03   |

|              |                       |          |                                   |                       |  |                |                                                          |         |                                                                                             |                                                                                                                                                                                                                                                                    |                                                                       |                           |     |     |    |        |
|--------------|-----------------------|----------|-----------------------------------|-----------------------|--|----------------|----------------------------------------------------------|---------|---------------------------------------------------------------------------------------------|--------------------------------------------------------------------------------------------------------------------------------------------------------------------------------------------------------------------------------------------------------------------|-----------------------------------------------------------------------|---------------------------|-----|-----|----|--------|
| BLAT         | Antibiotic Resistance | CARD     | Clostridium perfringens IRLC2505A | fig1502.2785.psg.812  |  | Q0SSM7         | Clostridium perfringens SM101                            | mpfF    | putative membrane protein                                                                   |                                                                                                                                                                                                                                                                    | antibiotic target modifying enzyme,peptide antibiotic resistance gene |                           | 100 | 100 | 95 | 0.0    |
| K-mer Search | Antibiotic Resistance | PATRIC   | Clostridium perfringens IRLC2505A | fig1502.2785.psg.4118 |  |                |                                                          | NimB    | Nitroimidazole resistance protein NimB                                                      | Nitroimidazole resistance protein NimB                                                                                                                                                                                                                             | antibiotic inactivation enzyme                                        | 16338949                  |     |     |    |        |
| K-mer Search | Antibiotic Resistance | PATRIC   | Clostridium perfringens IRLC2505A | fig1502.2785.psg.2790 |  |                |                                                          | gyrB    | DNA gyrase subunit B (EC 5.99.1.3)                                                          | DNA gyrase subunit B (EC 5.99.1.3)                                                                                                                                                                                                                                 | antibiotic target in susceptible species                              | 21693461;22279180;9293187 |     |     |    |        |
| BLAT         | Transporter           | TCDB     | Clostridium perfringens IRLC2505A | fig1502.2785.psg.3028 |  | Q8XME6         | Clostridium perfringens (strain 13 / Type A)             |         | Carbon starvation protein A                                                                 | the putative peptide transporter carbon starvation estA (esta) family.                                                                                                                                                                                             | 2.A.114.1.4                                                           |                           | 100 | 100 | 99 | 1e-277 |
| BLAT         | Virulence Factor      | VFDB     | Clostridium perfringens IRLC2505A | fig1502.2785.psg.1125 |  | VFG002278      | Clostridium perfringens str. 13                          | nagJ    | Protein O-GlcNAcase (EC 3.2.1.169)                                                          |                                                                                                                                                                                                                                                                    | Exoenzyme,Carbohydrate-active enzyme,Hyaluronidase                    |                           | 100 | 100 | 96 | 0.0    |
| BLAT         | Drug Target           | DrugBank | Clostridium perfringens IRLC2505A | fig1502.2785.psg.3726 |  | P60339         | Thermus thermophilus (strain HB8 / ATCC 27634 / DSM 579) | tufB    | Translation elongation factor Tu                                                            | Aurodox/Guanosine-5'-Diphosphate                                                                                                                                                                                                                                   | Drug target                                                           |                           | 5   | 96  | 87 | 9e-04  |
| K-mer Search | Antibiotic Resistance | PATRIC   | Clostridium perfringens IRLC2505A | fig1502.2785.psg.3986 |  |                |                                                          | TetB(P) | Tetracycline resistance, ribosomal protection type => TetB(P)                               | Tetracycline resistance, ribosomal protection type => TetB(P)                                                                                                                                                                                                      | antibiotic target protection protein                                  | 8170402;11717269          |     |     |    |        |
| K-mer Search | Antibiotic Resistance | PATRIC   | Clostridium perfringens IRLC2505A | fig1502.2785.psg.825  |  |                |                                                          | S10p    | SSU ribosomal protein S10p (S20c)                                                           | SSU ribosomal protein S10p (S20c)                                                                                                                                                                                                                                  | antibiotic target in susceptible species                              | 26124155                  |     |     |    |        |
| BLAT         | Transporter           | TCDB     | Clostridium perfringens IRLC2505A | fig1502.2785.psg.2308 |  | B1V6H1         | Clostridium perfringens D str. JGS1721                   |         | hypothetical protein                                                                        | the 11 holin ( 11 holin) family.                                                                                                                                                                                                                                   | 1.E.11.2.2                                                            |                           | 100 | 100 | 87 | 2e-35  |
| K-mer Search | Antibiotic Resistance | PATRIC   | Clostridium perfringens IRLC2505A | fig1502.2785.psg.314  |  |                |                                                          | GdpD    | Glycerophosphoryl diester phosphodiesterase (EC 3.1.4.46)                                   | Glycerophosphoryl diester phosphodiesterase (EC 3.1.4.46)                                                                                                                                                                                                          | protein altering cell wall charge conferring antibiotic resistance    | 21899450                  |     |     |    |        |
| K-mer Search | Antibiotic Resistance | PATRIC   | Clostridium perfringens IRLC2505A | fig1502.2785.psg.1498 |  |                |                                                          | kaaA    | 3-oxoacyl-[acyl-carrier-protein] synthase, KASII (EC 2.3.1.179)                             | 3-oxoacyl-[acyl-carrier-protein] synthase, KASII (EC 2.3.1.179)                                                                                                                                                                                                    | antibiotic target in susceptible species                              | 10428945                  |     |     |    |        |
| BLAT         | Virulence Factor      | Victors  | Clostridium perfringens IRLC2505A | fig1502.2785.psg.1147 |  | 29376182       | Enterococcus faecalis V583                               | EF1623  | Ethanolamine utilization protein similar to PduA/PduJ                                       |                                                                                                                                                                                                                                                                    |                                                                       | 17307944                  | 91  | 91  | 92 | 4e-38  |
| BLAT         | Virulence Factor      | VFDB     | Clostridium perfringens IRLC2505A | fig1502.2785.psg.3754 |  | VFG002274      | Clostridium perfringens str. 13                          | plc     | Broad-substrate range phospholipase C (EC 3.1.4.3)                                          |                                                                                                                                                                                                                                                                    | Toxin,Zinc-metallophospholipase C                                     |                           | 100 | 100 | 99 | 1e-242 |
| BLAT         | Antibiotic Resistance | CARD     | Clostridium perfringens IRLC2505A | fig1502.2785.psg.3983 |  | AAA20116.1     | Clostridium perfringens                                  | tetA(P) | Tetracycline resistance, MFS efflux pump => TetA(P)                                         |                                                                                                                                                                                                                                                                    | efflux pump conferring antibiotic resistance                          |                           | 100 | 100 | 98 | 1e-234 |
| K-mer Search | Antibiotic Resistance | PATRIC   | Clostridium perfringens IRLC2505A | fig1502.2785.psg.513  |  |                |                                                          | fabV    | Enoyl-[acyl-carrier-protein] reductase [NADH] (EC 1.3.1.9), FabV => refractory to triclosan | Enoyl-[acyl-carrier-protein] reductase [NADH] (EC 1.3.1.9), FabV => refractory to triclosan                                                                                                                                                                        | antibiotic target replacement protein                                 | 19933806;18032386         |     |     |    |        |
| BLAT         | Virulence Factor      | VFDB     | Clostridium perfringens IRLC2505A | fig1502.2785.psg.2129 |  | VFG002282      | Clostridium perfringens str. 13                          | cloSI   | hypothetical protein                                                                        |                                                                                                                                                                                                                                                                    | Exoenzyme,Cysteine endopeptidase                                      |                           | 99  | 100 | 97 | 1e-306 |
| K-mer Search | Antibiotic Resistance | PATRIC   | Clostridium perfringens IRLC2505A | fig1502.2785.psg.3718 |  |                |                                                          | MurA    | UDP-N-acetylglucosamine 1-carboxyvinyltransferase (EC 2.5.1.7)                              | UDP-N-acetylglucosamine 1-carboxyvinyltransferase (EC 2.5.1.7)                                                                                                                                                                                                     | antibiotic target in susceptible species                              | 8994972                   |     |     |    |        |
| BLAT         | Antibiotic Resistance | CARD     | Clostridium perfringens IRLC2505A | fig1502.2785.psg.3726 |  | WP_009887863.1 | Clostridium difficile                                    |         | Translation elongation factor Tu                                                            |                                                                                                                                                                                                                                                                    | antibiotic resistant gene variant or mutant,clfamycin resistance gene |                           | 6   | 96  | 83 | 7e-03  |
| BLAT         | Antibiotic Resistance | CARD     | Clostridium perfringens IRLC2505A | fig1502.2785.psg.3987 |  | AAA20117.1     | Clostridium perfringens                                  | tetB(P) | Tetracycline resistance, ribosomal protection type => TetB(P)                               |                                                                                                                                                                                                                                                                    | antibiotic target protection protein,tetracycline resistance gene     |                           | 48  | 99  | 98 | 1e-180 |
| K-mer Search | Antibiotic Resistance | PATRIC   | Clostridium perfringens IRLC2505A | fig1502.2785.psg.3983 |  |                |                                                          | TetA(P) | Tetracycline resistance, MFS efflux pump => TetA(P)                                         | Tetracycline resistance, MFS efflux pump => TetA(P)                                                                                                                                                                                                                | efflux pump conferring antibiotic resistance                          | 8170402;11717269          |     |     |    |        |
| BLAT         | Virulence Factor      | VFDB     | Clostridium perfringens IRLC2505A | fig1502.2785.psg.4032 |  | VFG002279      | Clostridium perfringens str. 13                          | nagJ    | Protein O-GlcNAcase (EC 3.2.1.169)                                                          |                                                                                                                                                                                                                                                                    | Exoenzyme,Carbohydrate-active enzyme,Hyaluronidase                    |                           | 100 | 100 | 98 | 0.0    |
| K-mer Search | Antibiotic Resistance | PATRIC   | Clostridium perfringens IRLC2505A | fig1502.2785.psg.80   |  |                |                                                          | dxr     | 1-deoxy-D-xylulose 5-phosphate reductoisomerase (EC 1.1.1.267)                              | 1-deoxy-D-xylulose 5-phosphate reductoisomerase (EC 1.1.1.267)                                                                                                                                                                                                     | antibiotic target in susceptible species                              | 16321944                  |     |     |    |        |
| K-mer Search | Antibiotic Resistance | PATRIC   | Clostridium perfringens IRLC2505A | fig1502.2785.psg.1695 |  |                |                                                          | MprF    | L-O-lysylphosphatidylglycerol synthase (EC 2.3.2.3)                                         | L-O-lysylphosphatidylglycerol synthase (EC 2.3.2.3)                                                                                                                                                                                                                | protein altering cell wall charge conferring antibiotic resistance    | 19289517;16723576         |     |     |    |        |
| BLAT         | Drug Target           | DrugBank | Clostridium perfringens IRLC2505A | fig1502.2785.psg.399  |  | Q8XJ01         | Clostridium perfringens (strain 13 / Type A)             | pfbA    | Multimodular transpeptidase (strain 13 / Type A)                                            | Cefotam,Cefmenoxime,Flucloracillin; Phenoxymethylpenicillin,Loracarbef,Cefalotin; Oxacillin,Cefaclor,Merzocillin,Cyclacillin; Amoxicillin,Azlocillin,Cefitoren,Cefuroxime; Cefapirin,Cloxacillin,Bacampicillin,Pivampicillin; Pivmecillinam,Degraded Cephaloridine | Drug target                                                           |                           | 99  | 81  | 97 | 0.0    |
| BLAT         | Drug Target           | DrugBank | Clostridium perfringens IRLC2505A | fig1502.2785.psg.824  |  | P60339         | Thermus thermophilus (strain HB8 / ATCC 27634 / DSM 579) | tufB    | Translation elongation factor Tu                                                            | Aurodox/Guanosine-5'-Diphosphate                                                                                                                                                                                                                                   | Drug target                                                           |                           | 5   | 96  | 87 | 9e-04  |
| BLAT         | Antibiotic Resistance | NDARO    | Clostridium perfringens IRLC2505A | fig1502.2785.psg.3987 |  | WP_012478245.1 | Clostridium perfringens                                  |         | Tetracycline resistance, ribosomal protection type => TetB(P)                               | tetracycline resistance ribosomal protection protein TetB(P)                                                                                                                                                                                                       |                                                                       |                           | 48  | 99  | 98 | 1e-180 |



|              |                       |          |                                   |                       |  |  |            |                                                 |          |                                                                                 |                                                                                            |                                                                                                                                          |                           |                  |     |     |        |        |
|--------------|-----------------------|----------|-----------------------------------|-----------------------|--|--|------------|-------------------------------------------------|----------|---------------------------------------------------------------------------------|--------------------------------------------------------------------------------------------|------------------------------------------------------------------------------------------------------------------------------------------|---------------------------|------------------|-----|-----|--------|--------|
| K-mer Search | Antibiotic Resistance | PATRIC   | Clostridium perfringens IRMC2505A | fig1502.2785.psg.646  |  |  |            |                                                 | rho      | Transcription termination factor Rho                                            | Transcription termination factor Rho                                                       | antibiotic target in susceptible species                                                                                                 | 8466900                   |                  |     |     |        |        |
| K-mer Search | Antibiotic Resistance | PATRIC   | Clostridium perfringens IRMC2505A | fig1502.2785.psg.2791 |  |  |            |                                                 | gyrA     | DNA gyrase subunit A (EC 5.99.1.3)                                              | DNA gyrase subunit A (EC 5.99.1.3)                                                         | antibiotic target in susceptible species                                                                                                 | 9293187                   |                  |     |     |        |        |
| K-mer Search | Antibiotic Resistance | PATRIC   | Clostridium perfringens IRMC2505A | fig1502.2785.psg.1881 |  |  |            |                                                 | GdpD     | Glycerophosphoryl diester phosphodiesterase (EC 3.1.4.46)                       | Glycerophosphoryl diester phosphodiesterase (EC 3.1.4.46)                                  | protein altering cell wall charge conferring antibiotic resistance                                                                       | 21899450                  |                  |     |     |        |        |
| K-mer Search | Antibiotic Resistance | PATRIC   | Clostridium perfringens IRMC2505A | fig1502.2785.psg.60   |  |  |            |                                                 | PgsA     | CDP-diacylglycerol--glycerol-3-phosphate 3-phosphatidyltransferase (EC 2.7.8.5) | CDP-diacylglycerol--glycerol-3-phosphate 3-phosphatidyltransferase (EC 2.7.8.5)            | protein altering cell wall charge conferring antibiotic resistance                                                                       | 22238576                  |                  |     |     |        |        |
| K-mer Search | Antibiotic Resistance | PATRIC   | Clostridium perfringens IRMC2505A | fig1502.2785.psg.2776 |  |  |            |                                                 | gidB     | 16S rRNA (guanine(527)-N(7))-methyltransferase (EC 2.1.1.170)                   | 16S rRNA (guanine(527)-N(7))-methyltransferase (EC 2.1.1.170)                              | gene conferring resistance via absence                                                                                                   | 17238915                  |                  |     |     |        |        |
| BLAT         | Virulence Factor      | Victors  | Clostridium perfringens IRMC2505A | fig1502.2785.psg.3754 |  |  | 18309018   | Clostridium perfringens str. 13                 | nle      | Broad-substrate range phospholipase C (EC 3.1.4.3)                              |                                                                                            |                                                                                                                                          | 7746141                   | 100              | 100 | 99  | 1e-242 |        |
| BLAT         | Transporter           | TCDB     | Clostridium perfringens IRMC2505A | fig1502.2785.psg.3795 |  |  | Q0SPM4     | Clostridium perfringens (strain SM101 / Type A) |          | bacteriocin UviB                                                                | the bhla holin (bhla holin) family.                                                        | 1.E.27.1.5                                                                                                                               |                           | 95               | 92  | 98  | 3e-26  |        |
| K-mer Search | Antibiotic Resistance | PATRIC   | Clostridium perfringens IRMC2505A | fig1502.2785.psg.3343 |  |  |            |                                                 | gyrA     | DNA gyrase subunit A (EC 5.99.1.3)                                              | DNA gyrase subunit A (EC 5.99.1.3)                                                         | antibiotic target in susceptible species                                                                                                 | 9293187                   |                  |     |     |        |        |
| BLAT         | Virulence Factor      | VFDB     | Clostridium perfringens IRMC2505A | fig1502.2785.psg.736  |  |  | VFG002281  | Clostridium perfringens str. 13                 | naaL     | hypothetical protein                                                            |                                                                                            | Exoenzyme,Carbohydrate-active enzyme,Hyaluronidase                                                                                       |                           | 100              | 100 | 95  | 0.0    |        |
| K-mer Search | Antibiotic Resistance | PATRIC   | Clostridium perfringens IRMC2505A | fig1502.2785.psg.3735 |  |  |            |                                                 | rpoC     | DNA-directed RNA polymerase beta' subunit (EC 2.7.7.6)                          | DNA-directed RNA polymerase beta' subunit (EC 2.7.7.6)                                     | antibiotic target in susceptible species                                                                                                 | 16723576                  |                  |     |     |        |        |
| BLAT         | Virulence Factor      | VFDB     | Clostridium perfringens IRMC2505A | fig1502.2785.psg.3010 |  |  | VFG002283  | Clostridium perfringens str. 13                 | nanI     | Sialidase (EC 3.2.1.18)                                                         |                                                                                            | Exoenzyme,Carbohydrate-active enzyme,Sialidase                                                                                           |                           | 100              | 100 | 99  | 0.0    |        |
| BLAT         | Virulence Factor      | VFDB     | Clostridium perfringens IRMC2505A | fig1502.2785.psg.2195 |  |  | VFG002276  | Clostridium perfringens str. 13                 | colA     | Microbial collagenase (EC 3.4.24.3)                                             |                                                                                            | Exoenzyme,Collagenase                                                                                                                    |                           | 100              | 100 | 98  | 0.0    |        |
| K-mer Search | Antibiotic Resistance | PATRIC   | Clostridium perfringens IRMC2505A | fig1502.2785.psg.3984 |  |  |            |                                                 | TetB(P)  | Tetracycline resistance, ribosomal protection type => TetB(P)                   | Tetracycline resistance, ribosomal protection type => TetB(P)                              | antibiotic target protection protein                                                                                                     | 8170402;11717269          |                  |     |     |        |        |
| K-mer Search | Antibiotic Resistance | PATRIC   | Clostridium perfringens IRMC2505A | fig1502.2785.psg.2868 |  |  |            |                                                 | MurA     | UDP-N-acetylglucosamine 1-carboxyvinyltransferase (EC 2.5.1.7)                  | UDP-N-acetylglucosamine 1-carboxyvinyltransferase (EC 2.5.1.7)                             | antibiotic target in susceptible species                                                                                                 | 8994972                   |                  |     |     |        |        |
| BLAT         | Antibiotic Resistance | CARD     | Clostridium perfringens IRMC2505A | fig1502.2785.psg.3985 |  |  | AAA20117.1 | Clostridium perfringens                         | tetB(P)  | Tetracycline resistance, ribosomal protection type => TetB(P)                   |                                                                                            | antibiotic target protection protein,tetracycline resistance gene                                                                        |                           | 13               | 91  | 95  | 5e-40  |        |
| BLAT         | Drug Target           | DrugBank | Clostridium perfringens IRMC2505A | fig1502.2785.psg.2494 |  |  | P54965     | Clostridium perfringens (strain 13 / Type A)    | cbh      | Choloylglycine hydrolase (EC 3.5.1.24)                                          | 2-Aminoethanesulfonic Acid;Cholic Acid;Deoxycholic Acid                                    | Drug target                                                                                                                              |                           | 100              | 100 | 91  | 1e-182 |        |
| K-mer Search | Antibiotic Resistance | PATRIC   | Clostridium perfringens IRMC2505A | fig1502.2785.psg.2322 |  |  |            |                                                 | folP     | Dihydropteroate synthase (EC 2.5.1.15)                                          | Dihydropteroate synthase (EC 2.5.1.15)                                                     | antibiotic target in susceptible species                                                                                                 | 15673783                  |                  |     |     |        |        |
| K-mer Search | Antibiotic Resistance | PATRIC   | Clostridium perfringens IRMC2505A | fig1502.2785.psg.2156 |  |  |            |                                                 | Ddl      | D-alanine--D-alanine ligase (EC 6.3.2.4)                                        | D-alanine--D-alanine ligase (EC 6.3.2.4)                                                   | antibiotic target in susceptible species                                                                                                 | 24303782;24033232         |                  |     |     |        |        |
| BLAT         | Virulence Factor      | VFDB     | Clostridium perfringens IRMC2505A | fig1502.2785.psg.2700 |  |  | VFG002284  | Clostridium perfringens str. 13                 | nanJ     | Sialidase (EC 3.2.1.18)                                                         |                                                                                            | Exoenzyme,Carbohydrate-active enzyme,Sialidase                                                                                           |                           | 100              | 100 | 95  | 0.0    |        |
| BLAT         | Transporter           | TCDB     | Clostridium perfringens IRMC2505A | fig1502.2785.psg.3198 |  |  | Q186B7     | Clostridium difficile (strain 630)              |          | Sulfite transporter, NirC family                                                | the formate-nitrite transporter (fnt) family.                                              | 1.A.16.3.3                                                                                                                               |                           | 62               | 99  | 100 | 1e-85  |        |
| BLAT         | Virulence Factor      | VFDB     | Clostridium perfringens IRMC2505A | fig1502.2785.psg.2183 |  |  | VFG002275  | Clostridium perfringens str. 13                 | pfoA     | Thiol-activated cytotoxin                                                       |                                                                                            | Toxin,Membrane-damaging,Pore-forming,Channel-forming involving beta-sheet-containing toxin (beta-barrel),Cholesterol-dependent cytotoxin |                           | 92               | 88  | 87  | 1e-243 |        |
| BLAT         | Virulence Factor      | VFDB     | Clostridium perfringens IRMC2505A | fig1502.2785.psg.2213 |  |  | VFG002277  | Clostridium perfringens str. 13                 | nagH     | Hyaluronoglucosaminidase (EC 3.2.1.35)                                          |                                                                                            | Exoenzyme,Carbohydrate-active enzyme,Hyaluronidase                                                                                       |                           | 100              | 100 | 97  | 0.0    |        |
| K-mer Search | Antibiotic Resistance | PATRIC   | Clostridium perfringens IRMC2505A | fig1502.2785.psg.1762 |  |  |            |                                                 | Ddl      | D-alanine--D-alanine ligase (EC 6.3.2.4)                                        | D-alanine--D-alanine ligase (EC 6.3.2.4)                                                   | antibiotic target in susceptible species                                                                                                 | 24303782;24033232         |                  |     |     |        |        |
| BLAT         | Transporter           | TCDB     | Clostridium perfringens IRMC2505A | fig1502.2785.psg.2585 |  |  | P50487     | Clostridium perfringens                         |          | uracil-xanthine permease                                                        | the nucleobase/ascorbate transporter (nat) or nucleobase:cation symporter-2 (nsc2) family. | 2.A.40.2.1                                                                                                                               |                           | 11792842;8162194 | 100 | 100 | 99     | 1e-250 |
| K-mer Search | Antibiotic Resistance | PATRIC   | Clostridium perfringens IRMC2505A | fig1502.2785.psg.2657 |  |  |            |                                                 | Alr      | Alanine racemase (EC 5.1.1.1)                                                   | Alanine racemase (EC 5.1.1.1)                                                              | antibiotic target in susceptible species                                                                                                 | 19748470;24303782         |                  |     |     |        |        |
| K-mer Search | Antibiotic Resistance | PATRIC   | Clostridium perfringens IRMC2505A | fig1502.2785.psg.3429 |  |  |            |                                                 | folA, Df | Dihydrofolate reductase (EC 1.5.1.3)                                            | Dihydrofolate reductase (EC 1.5.1.3)                                                       | antibiotic target in susceptible species                                                                                                 | 20169085;25288078         |                  |     |     |        |        |
| BLAT         | Transporter           | TCDB     | Clostridium perfringens IRMC2505A | fig1502.2785.psg.1109 |  |  | H7CZV2     | Clostridium perfringens F262                    |          | hypothetical protein                                                            | the mycobacterial 4 tms phage holin (mp4 holin) family.                                    | 1.E.40.4.3                                                                                                                               |                           | 100              | 100 | 97  | 1e-60  |        |
| K-mer Search | Antibiotic Resistance | PATRIC   | Clostridium perfringens IRMC2505A | fig1502.2785.psg.3734 |  |  |            |                                                 | rpoB     | DNA-directed RNA polymerase beta subunit (EC 2.7.7.6)                           | DNA-directed RNA polymerase beta subunit (EC 2.7.7.6)                                      | antibiotic target in susceptible species                                                                                                 | 3050121;15047531;16723576 |                  |     |     |        |        |

**Supplementary Table S4:** Gene families are ranked by alignment score for phylogenetic tree of IRMC2505A genome.

| <b>PGFam</b> | <b>Align.<br/>Score</b> | <b>Align.<br/>Length</b> | <b>Num<br/>Seqs</b> | <b>Mean<br/>Sqr<br/>Freq</b> | <b>Prop<br/>Gaps</b> | <b>Used In<br/>Analysis</b> | <b>Product</b>                                                            |
|--------------|-------------------------|--------------------------|---------------------|------------------------------|----------------------|-----------------------------|---------------------------------------------------------------------------|
| PGF_02797402 | 27.70                   | 1333                     | 22                  | 0.759                        | 0.070                | True                        | DNA-directed RNA polymerase beta subunit (EC 2.7.7.6)                     |
| PGF_02704551 | 27.20                   | 1269                     | 22                  | 0.764                        | 0.071                | True                        | DNA-directed RNA polymerase beta' subunit (EC 2.7.7.6)                    |
| PGF_05171623 | 22.81                   | 1088                     | 22                  | 0.692                        | 0.045                | True                        | Isoleucyl-tRNA synthetase (EC 6.1.1.5)                                    |
| PGF_05500127 | 21.83                   | 903                      | 22                  | 0.726                        | 0.024                | True                        | Valyl-tRNA synthetase (EC 6.1.1.9)                                        |
| PGF_00950554 | 19.48                   | 674                      | 22                  | 0.750                        | 0.022                | True                        | Excinuclease ABC subunit B                                                |
| PGF_02906681 | 19.10                   | 732                      | 22                  | 0.706                        | 0.016                | True                        | Transcription accessory protein (S1 RNA-binding domain)                   |
| PGF_03104485 | 18.87                   | 752                      | 22                  | 0.688                        | 0.062                | True                        | Polyribonucleotide nucleotidyltransferase (EC 2.7.7.8)                    |
| PGF_00033095 | 18.36                   | 817                      | 22                  | 0.642                        | 0.029                | True                        | Phenylalanyl-tRNA synthetase beta chain (EC 6.1.1.20)                     |
| PGF_10300474 | 18.13                   | 714                      | 22                  | 0.679                        | 0.025                | True                        | DNA topoisomerase I (EC 5.99.1.2)                                         |
| PGF_00030643 | 17.91                   | 541                      | 22                  | 0.770                        | 0.019                | True                        | Peptide chain release factor 3                                            |
| PGF_06776852 | 17.37                   | 804                      | 22                  | 0.612                        | 0.022                | True                        | Recombination inhibitory protein MutS2                                    |
| PGF_00057270 | 17.26                   | 1020                     | 22                  | 0.541                        | 0.076                | True                        | DNA topoisomerase IV subunit A (EC 5.99.1.3)                              |
| PGF_09950730 | 17.26                   | 1197                     | 22                  | 0.499                        | 0.009                | True                        | Chromosome partition protein smc                                          |
| PGF_03752158 | 17.00                   | 635                      | 22                  | 0.674                        | 0.027                | True                        | FIG092679: Fe-S oxidoreductase                                            |
| PGF_00047095 | 16.34                   | 811                      | 22                  | 0.574                        | 0.081                | True                        | RecD-like DNA helicase YrrC                                               |
| PGF_00021217 | 16.31                   | 518                      | 22                  | 0.716                        | 0.013                | True                        | 2,3-bisphosphoglycerate-independent phosphoglycerate mutase (EC 5.4.2.12) |
| PGF_10525419 | 16.23                   | 923                      | 22                  | 0.534                        | 0.243                | True                        | Translation initiation factor 2                                           |
| PGF_00075770 | 16.17                   | 454                      | 22                  | 0.759                        | 0.006                | True                        | FIG00519347: Ribonucleotide reductase-like protein                        |
| PGF_00066502 | 15.95                   | 467                      | 22                  | 0.738                        | 0.010                | True                        | Asparaginyl-tRNA synthetase (EC 6.1.1.22)                                 |
| PGF_02277678 | 15.78                   | 406                      | 22                  | 0.783                        | 0.023                | True                        | Phosphoglycerate kinase (EC 2.7.2.3)                                      |
| PGF_00025600 | 15.78                   | 500                      | 22                  | 0.706                        | 0.017                | True                        | Nicotinate phosphoribosyltransferase (EC 6.3.4.21)                        |
| PGF_00007024 | 15.60                   | 442                      | 22                  | 0.742                        | 0.008                | True                        | GTP-binding protein EngA                                                  |
| PGF_00052238 | 15.24                   | 474                      | 22                  | 0.700                        | 0.049                | True                        | Signal recognition particle protein Ffh                                   |
| PGF_01137124 | 14.94                   | 465                      | 22                  | 0.693                        | 0.033                | True                        | Phosphoglucosamine mutase (EC 5.4.2.10)                                   |

|              |       |     |    |       |       |      |                                                                                                                  |
|--------------|-------|-----|----|-------|-------|------|------------------------------------------------------------------------------------------------------------------|
| PGF_00007012 | 14.89 | 371 | 22 | 0.773 | 0.016 | True | GTP-binding and nucleic acid-binding protein YchF                                                                |
| PGF_02226715 | 14.86 | 705 | 22 | 0.560 | 0.036 | True | ATP-dependent DNA helicase RecG (EC 3.6.4.12)                                                                    |
| PGF_00030640 | 14.55 | 363 | 22 | 0.763 | 0.012 | True | Peptide chain release factor 1                                                                                   |
| PGF_00011081 | 14.47 | 853 | 22 | 0.495 | 0.134 | True | Helicase PriA essential for oriC/DnaA-independent DNA replication                                                |
| PGF_01281052 | 14.45 | 856 | 22 | 0.494 | 0.086 | True | Uncharacterized protease CPF_2136                                                                                |
| PGF_02029783 | 14.40 | 443 | 22 | 0.684 | 0.036 | True | GTP-binding protein Obg                                                                                          |
| PGF_00422271 | 14.39 | 320 | 22 | 0.805 | 0.015 | True | DNA-directed RNA polymerase alpha subunit (EC 2.7.7.6)                                                           |
| PGF_00060120 | 14.24 | 467 | 22 | 0.659 | 0.027 | True | SCIIF radical SAM maturase                                                                                       |
| PGF_00024314 | 14.20 | 571 | 22 | 0.594 | 0.064 | True | NAD(FAD)-utilizing dehydrogenase, sll0175 homolog                                                                |
| PGF_02019462 | 13.89 | 341 | 22 | 0.752 | 0.006 | True | Phenylalanyl-tRNA synthetase alpha chain (EC 6.1.1.20)                                                           |
| PGF_00019248 | 13.68 | 553 | 22 | 0.582 | 0.012 | True | Manganese-dependent inorganic pyrophosphatase (EC 3.6.1.1)                                                       |
| PGF_08562657 | 13.67 | 512 | 22 | 0.604 | 0.118 | True | tRNA-i(6)A37 methylthiotransferase (EC 2.8.4.3)                                                                  |
| PGF_00063999 | 13.67 | 464 | 22 | 0.634 | 0.012 | True | UDP-N-acetylmuramate--L-alanine ligase (EC 6.3.2.8)                                                              |
| PGF_05049118 | 13.56 | 358 | 22 | 0.717 | 0.039 | True | Holliday junction ATP-dependent DNA helicase RuvB (EC 3.6.4.12)                                                  |
| PGF_03520151 | 13.54 | 419 | 22 | 0.661 | 0.102 | True | Cell division protein FtsZ                                                                                       |
| PGF_00016393 | 13.49 | 281 | 22 | 0.804 | 0.015 | True | LSU ribosomal protein L2p (L8e)                                                                                  |
| PGF_00007028 | 13.30 | 626 | 22 | 0.531 | 0.086 | True | Ribosome LSU-associated GTP-binding protein HflX                                                                 |
| PGF_09111052 | 13.25 | 407 | 22 | 0.657 | 0.028 | True | Phosphopantothenoylcysteine decarboxylase (EC 4.1.1.36) /<br>Phosphopantothenoylcysteine synthetase (EC 6.3.2.5) |
| PGF_09945387 | 13.13 | 600 | 22 | 0.536 | 0.038 | True | Fibronectin/fibrinogen-binding protein                                                                           |
| PGF_00426236 | 13.08 | 359 | 22 | 0.690 | 0.027 | True | (E)-4-hydroxy-3-methylbut-2-enyl-diphosphate synthase (flavodoxin)<br>(EC 1.17.7.3)                              |
| PGF_02620298 | 13.03 | 472 | 22 | 0.600 | 0.042 | True | Argininosuccinate lyase (EC 4.3.2.1)                                                                             |
| PGF_00048846 | 12.91 | 470 | 22 | 0.596 | 0.046 | True | Ribosomal protein S12p Asp88 (E. coli) methylthiotransferase (EC<br>2.8.4.4)                                     |
| PGF_09019918 | 12.77 | 438 | 22 | 0.610 | 0.025 | True | Glutamate-1-semialdehyde 2,1-aminomutase (EC 5.4.3.8)                                                            |
| PGF_00421796 | 12.71 | 579 | 22 | 0.528 | 0.025 | True | DNA repair protein RecN                                                                                          |
| PGF_00413298 | 12.64 | 487 | 22 | 0.573 | 0.087 | True | tRNA t(6)A37-methylthiotransferase (EC 2.8.4.5)                                                                  |
| PGF_00033444 | 12.61 | 716 | 22 | 0.471 | 0.087 | True | Cyclic-di-AMP phosphodiesterase GdpP                                                                             |
| PGF_07063065 | 12.50 | 436 | 22 | 0.598 | 0.158 | True | Transcription termination protein NusA                                                                           |
| PGF_04505269 | 12.38 | 246 | 22 | 0.790 | 0.050 | True | SSU ribosomal protein S2p (SAe)                                                                                  |

|              |       |     |    |       |       |      |                                                                                                                                    |
|--------------|-------|-----|----|-------|-------|------|------------------------------------------------------------------------------------------------------------------------------------|
| PGF_05507938 | 12.36 | 794 | 22 | 0.439 | 0.184 | True | DNA mismatch repair protein MutL                                                                                                   |
| PGF_00004169 | 12.26 | 711 | 22 | 0.460 | 0.205 | True | Fe-S oxidoreductase                                                                                                                |
| PGF_02923127 | 12.17 | 240 | 22 | 0.785 | 0.014 | True | Uridylate kinase (EC 2.7.4.22)                                                                                                     |
| PGF_03788368 | 12.02 | 296 | 22 | 0.699 | 0.008 | True | RNase adapter protein RapZ                                                                                                         |
| PGF_00618776 | 11.89 | 361 | 22 | 0.626 | 0.038 | True | 23S rRNA (adenine(2503)-C(2))-methyltransferase @ tRNA (adenine(37)-C(2))-methyltransferase (EC 2.1.1.192)                         |
| PGF_00007027 | 11.84 | 306 | 22 | 0.677 | 0.034 | True | GTP-binding protein Era                                                                                                            |
| PGF_03295331 | 11.80 | 374 | 22 | 0.610 | 0.044 | True | UDP-N-acetylglucosamine--N-acetylmuramyl-(pentapeptide) pyrophosphoryl-undecaprenol N-acetylglucosamine transferase (EC 2.4.1.227) |
| PGF_00415407 | 11.77 | 392 | 22 | 0.595 | 0.032 | True | 23S rRNA (guanine(2445)-N(2))-methyltransferase (EC 2.1.1.173)                                                                     |
| PGF_00049889 | 11.74 | 230 | 22 | 0.774 | 0.035 | True | SSU ribosomal protein S3p (S3e)                                                                                                    |
| PGF_00057483 | 11.63 | 819 | 22 | 0.406 | 0.385 | True | Transcription termination factor Rho                                                                                               |
| PGF_06936561 | 11.47 | 313 | 22 | 0.648 | 0.038 | True | Translation elongation factor Ts                                                                                                   |
| PGF_00769755 | 11.37 | 456 | 22 | 0.532 | 0.033 | True | 16S rRNA (cytosine(967)-C(5))-methyltransferase (EC 2.1.1.176)                                                                     |
| PGF_00403095 | 11.34 | 211 | 22 | 0.781 | 0.009 | True | Uracil phosphoribosyltransferase (EC 2.4.2.9)                                                                                      |
| PGF_00426877 | 11.24 | 299 | 22 | 0.650 | 0.052 | True | LSU ribosomal maturation GTPase RbgA (B. subtilis YlqF)                                                                            |
| PGF_00016443 | 11.14 | 181 | 22 | 0.828 | 0.008 | True | LSU ribosomal protein L5p (L11e)                                                                                                   |
| PGF_05767868 | 11.09 | 250 | 22 | 0.701 | 0.020 | True | Probable transcriptional regulatory protein YebC                                                                                   |
| PGF_00011463 | 11.05 | 286 | 22 | 0.654 | 0.053 | True | RNA binding methyltransferase FtsJ like                                                                                            |
| PGF_00418291 | 11.02 | 266 | 22 | 0.676 | 0.049 | True | Cobalt-precorrin-4 C(11)-methyltransferase (EC 2.1.1.271)                                                                          |
| PGF_00007045 | 10.72 | 304 | 22 | 0.615 | 0.145 | True | GTP-sensing transcriptional pleiotropic repressor CodY                                                                             |
| PGF_04807486 | 10.62 | 335 | 22 | 0.580 | 0.070 | True | tRNA dimethylallyltransferase (EC 2.5.1.75)                                                                                        |
| PGF_00049896 | 10.59 | 169 | 22 | 0.814 | 0.022 | True | SSU ribosomal protein S5p (S2e)                                                                                                    |
| PGF_00049904 | 10.59 | 156 | 22 | 0.848 | 0.000 | True | SSU ribosomal protein S7p (S5e)                                                                                                    |
| PGF_04512522 | 10.58 | 208 | 22 | 0.734 | 0.017 | True | LSU ribosomal protein L4p (L1e)                                                                                                    |
| PGF_06230969 | 10.48 | 553 | 22 | 0.446 | 0.092 | True | NAD(P)H-hydrate epimerase (EC 5.1.99.6) / ADP-dependent (S)-NAD(P)H-hydrate dehydratase (EC 4.2.1.136)                             |
| PGF_00425024 | 10.41 | 433 | 22 | 0.500 | 0.075 | True | Exodeoxyribonuclease VII large subunit (EC 3.1.11.6)                                                                               |
| PGF_00286985 | 10.39 | 462 | 22 | 0.483 | 0.111 | True | [FeFe]-hydrogenase maturation protein HydF                                                                                         |
| PGF_09155108 | 10.32 | 444 | 22 | 0.490 | 0.092 | True | Exonuclease SbcD                                                                                                                   |

|              |       |     |    |       |       |       |                                                                                                 |
|--------------|-------|-----|----|-------|-------|-------|-------------------------------------------------------------------------------------------------|
| PGF_00413208 | 10.25 | 269 | 22 | 0.625 | 0.107 | True  | tRNA (guanine(37)-N(1))-methyltransferase (EC 2.1.1.228)                                        |
| PGF_06461498 | 10.20 | 318 | 22 | 0.572 | 0.087 | True  | Orotidine 5'-phosphate decarboxylase (EC 4.1.1.23)                                              |
| PGF_00046555 | 10.14 | 234 | 22 | 0.663 | 0.089 | True  | RNA polymerase sporulation specific sigma factor SigH                                           |
| PGF_07695531 | 10.08 | 141 | 22 | 0.849 | 0.000 | True  | LSU ribosomal protein L11p (L12e)                                                               |
| PGF_00047155 | 10.07 | 217 | 22 | 0.684 | 0.029 | True  | Redox-sensing transcriptional repressor Rex                                                     |
| PGF_04244475 | 10.07 | 234 | 22 | 0.659 | 0.074 | True  | Adenylate kinase (EC 2.7.4.3)                                                                   |
| PGF_00016444 | 10.02 | 181 | 22 | 0.745 | 0.008 | True  | LSU ribosomal protein L6p (L9e)                                                                 |
| PGF_01212500 | 9.90  | 307 | 22 | 0.565 | 0.088 | True  | Diadenylate cyclase spyDAC; Bacterial checkpoint controller DisA with nucleotide-binding domain |
| PGF_00423533 | 9.90  | 316 | 22 | 0.557 | 0.104 | True  | 4-diphosphocytidyl-2-C-methyl-D-erythritol kinase (EC 2.7.1.148)                                |
| PGF_02746079 | 9.88  | 326 | 22 | 0.547 | 0.092 | True  | Transcription regulator [contains diacylglycerol kinase catalytic domain]                       |
| PGF_01867628 | 9.86  | 392 | 22 | 0.498 | 0.116 | True  | Heat-inducible transcription repressor HrcA                                                     |
| PGF_00000196 | 9.77  | 446 | 22 | 0.462 | 0.091 | True  | UPF0348 protein family                                                                          |
| PGF_02472178 | 9.71  | 277 | 22 | 0.583 | 0.068 | True  | Uncharacterized metal-dependent hydrolase YcfH                                                  |
| PGF_00049909 | 9.66  | 131 | 22 | 0.844 | 0.007 | True  | SSU ribosomal protein S9p (S16e)                                                                |
| PGF_06784545 | 9.64  | 304 | 22 | 0.553 | 0.053 | True  | (2E,6E)-farnesyl diphosphate synthase (EC 2.5.1.10)                                             |
| PGF_00689961 | 9.63  | 237 | 22 | 0.626 | 0.110 | True  | Guanylate kinase (EC 2.7.4.8)                                                                   |
| PGF_06941403 | 9.59  | 139 | 22 | 0.814 | 0.091 | True  | SSU ribosomal protein S12p (S23e)                                                               |
| PGF_00418285 | 9.56  | 287 | 22 | 0.565 | 0.151 | True  | Cobalt-precorrin-3 C(17)-methyltransferase (EC 2.1.1.272)                                       |
| PGF_10396914 | 9.55  | 319 | 22 | 0.535 | 0.072 | True  | Similar to ribosomal large subunit pseudouridine synthase D, Bacillus subtilis YjbO type        |
| PGF_08582746 | 9.49  | 318 | 22 | 0.532 | 0.128 | True  | 23S rRNA (guanosine(2251)-2'-O)-methyltransferase (EC 2.1.1.185)                                |
| PGF_06377994 | 9.45  | 544 | 22 | 0.405 | 0.265 | True  | FtsW-like cell division membrane protein CA_C0505                                               |
| PGF_07102049 | 9.42  | 309 | 22 | 0.536 | 0.050 | False | UPF0701 protein YicC                                                                            |
| PGF_02623406 | 9.31  | 318 | 22 | 0.522 | 0.026 | False | FMN adenylyltransferase (EC 2.7.7.2) / Riboflavin kinase (EC 2.7.1.26)                          |
| PGF_03174068 | 9.28  | 186 | 22 | 0.680 | 0.062 | False | Transcription antitermination protein NusG                                                      |
| PGF_00035334 | 9.22  | 342 | 22 | 0.498 | 0.066 | False | Adenosylcobinamide-phosphate synthase (EC 6.3.1.10)                                             |
| PGF_03790040 | 9.07  | 256 | 22 | 0.567 | 0.083 | False | Ribonuclease III (EC 3.1.26.3)                                                                  |
| PGF_00049906 | 9.07  | 133 | 22 | 0.786 | 0.008 | False | SSU ribosomal protein S8p (S15Ae)                                                               |

|              |      |     |    |       |       |       |                                                                                                      |
|--------------|------|-----|----|-------|-------|-------|------------------------------------------------------------------------------------------------------|
| PGF_00413295 | 8.98 | 339 | 22 | 0.488 | 0.135 | False | tRNA pseudouridine(55) synthase (EC 5.4.99.25)                                                       |
| PGF_00418309 | 8.89 | 238 | 22 | 0.576 | 0.121 | False | Cobalt-precorrin-8 methylmutase (EC 5.4.99.60)                                                       |
| PGF_00049840 | 8.88 | 126 | 22 | 0.791 | 0.028 | False | SSU ribosomal protein S13p (S18e)                                                                    |
| PGF_00413554 | 8.83 | 159 | 22 | 0.700 | 0.019 | False | tmRNA-binding protein SmpB                                                                           |
| PGF_03295678 | 8.81 | 199 | 22 | 0.624 | 0.041 | False | CDP-diacylglycerol--glycerol-3-phosphate 3-phosphatidyltransferase (EC 2.7.8.5)                      |
| PGF_01833449 | 8.68 | 343 | 22 | 0.468 | 0.074 | False | 3'-to-5' oligoribonuclease A, Bacillus type                                                          |
| PGF_00016445 | 8.58 | 126 | 22 | 0.764 | 0.036 | False | LSU ribosomal protein L7p/L12p (P1/P2)                                                               |
| PGF_06530721 | 8.57 | 228 | 22 | 0.567 | 0.058 | False | tRNA (guanine(46)-N(7))-methyltransferase (EC 2.1.1.33)                                              |
| PGF_02455692 | 8.56 | 237 | 22 | 0.556 | 0.072 | False | Cytidylate kinase (EC 2.7.4.25)                                                                      |
| PGF_04486278 | 8.34 | 340 | 22 | 0.452 | 0.057 | False | Biotin operon repressor / Biotin--protein ligase (EC 6.3.4.9)(EC 6.3.4.10)(EC 6.3.4.11)(EC 6.3.4.15) |
| PGF_00717752 | 8.31 | 250 | 22 | 0.526 | 0.105 | False | Cobalt-precorrin-2 C(20)-methyltransferase (EC 2.1.1.151)                                            |
| PGF_01213071 | 8.30 | 187 | 22 | 0.607 | 0.104 | False | LSU ribosomal protein L10p (P0)                                                                      |
| PGF_04788810 | 8.30 | 206 | 22 | 0.578 | 0.079 | False | Peptidyl-tRNA hydrolase (EC 3.1.1.29)                                                                |
| PGF_00048556 | 8.28 | 299 | 22 | 0.479 | 0.107 | False | Ribonuclease HII (EC 3.1.26.4)                                                                       |
| PGF_00016385 | 8.24 | 101 | 22 | 0.820 | 0.018 | False | LSU ribosomal protein L27p                                                                           |
| PGF_04845029 | 8.18 | 120 | 22 | 0.747 | 0.039 | False | LSU ribosomal protein L19p                                                                           |
| PGF_07411046 | 8.16 | 290 | 22 | 0.479 | 0.116 | False | Uncharacterized RNA methyltransferase YsgA                                                           |
| PGF_00016452 | 8.11 | 149 | 22 | 0.665 | 0.011 | False | LSU ribosomal protein L9p                                                                            |
| PGF_00007026 | 8.09 | 250 | 22 | 0.512 | 0.200 | False | GTP-binding protein EngB                                                                             |
| PGF_01382519 | 8.08 | 190 | 22 | 0.586 | 0.077 | False | Ribosome hibernation promoting factor Hpf                                                            |
| PGF_03021159 | 8.05 | 94  | 22 | 0.830 | 0.045 | False | UPF0296 protein YlzA                                                                                 |
| PGF_04762552 | 7.97 | 169 | 22 | 0.613 | 0.040 | False | Phosphopantetheine adenylyltransferase (EC 2.7.7.3)                                                  |
| PGF_03189552 | 7.93 | 223 | 22 | 0.531 | 0.109 | False | Holliday junction ATP-dependent DNA helicase RuvA (EC 3.6.4.12)                                      |
| PGF_03753407 | 7.85 | 164 | 22 | 0.613 | 0.068 | False | tRNA threonylcarbamoyladenosine biosynthesis protein TsaE                                            |
| PGF_00049854 | 7.82 | 85  | 22 | 0.849 | 0.011 | False | SSU ribosomal protein S17p (S11e)                                                                    |
| PGF_04978890 | 7.82 | 104 | 22 | 0.767 | 0.008 | False | LSU ribosomal protein L21p                                                                           |
| PGF_00020361 | 7.81 | 170 | 22 | 0.599 | 0.026 | False | Metal-dependent hydrolase YbeY, involved in rRNA and/or ribosome maturation and assembly             |
| PGF_00413203 | 7.81 | 184 | 22 | 0.576 | 0.147 | False | tRNA (cytidine(34)-2'-O)-methyltransferase (EC 2.1.1.207)                                            |

|              |      |     |    |       |       |       |                                                                                         |
|--------------|------|-----|----|-------|-------|-------|-----------------------------------------------------------------------------------------|
| PGF_00060431 | 7.71 | 72  | 22 | 0.909 | 0.000 | False | Translation initiation factor 1                                                         |
| PGF_07504595 | 7.58 | 153 | 22 | 0.613 | 0.066 | False | 3-hydroxyacyl-[acyl-carrier-protein] dehydratase, FabZ form (EC 4.2.1.59)               |
| PGF_00413189 | 7.56 | 244 | 22 | 0.484 | 0.061 | False | tRNA (adenine(22)-N(1))-methyltransferase (EC 2.1.1.217)                                |
| PGF_05579323 | 7.53 | 444 | 22 | 0.357 | 0.185 | False | L-threonine 3-O-phosphate decarboxylase (EC 4.1.1.81)                                   |
| PGF_00049860 | 7.42 | 102 | 22 | 0.735 | 0.083 | False | SSU ribosomal protein S19p (S15e)                                                       |
| PGF_00422085 | 7.39 | 101 | 22 | 0.735 | 0.071 | False | DNA-binding protein SpoVG                                                               |
| PGF_05636025 | 7.33 | 119 | 22 | 0.672 | 0.028 | False | FIG001802: Putative alkaline-shock protein                                              |
| PGF_00049847 | 7.33 | 88  | 22 | 0.781 | 0.011 | False | SSU ribosomal protein S15p (S13e)                                                       |
| PGF_06649360 | 7.23 | 230 | 22 | 0.477 | 0.155 | False | Segregation and condensation protein B                                                  |
| PGF_00016377 | 7.19 | 108 | 22 | 0.691 | 0.032 | False | LSU ribosomal protein L24p (L26e)                                                       |
| PGF_00049901 | 7.13 | 97  | 22 | 0.724 | 0.019 | False | SSU ribosomal protein S6p                                                               |
| PGF_00418278 | 7.13 | 498 | 22 | 0.319 | 0.310 | False | Cobalt-precorrin 5A hydrolase (EC 3.7.1.12)                                             |
| PGF_03990071 | 6.84 | 105 | 22 | 0.667 | 0.069 | False | LSU ribosomal protein L23p (L23Ae)                                                      |
| PGF_00049842 | 6.79 | 61  | 22 | 0.870 | 0.000 | False | SSU ribosomal protein S14p (S29e) @ SSU ribosomal protein S14p (S29e), zinc-dependent   |
| PGF_08421732 | 6.75 | 343 | 22 | 0.365 | 0.179 | False | NAD kinase (EC 2.7.1.23)                                                                |
| PGF_00178044 | 6.66 | 86  | 22 | 0.718 | 0.043 | False | SSU ribosomal protein S16p                                                              |
| PGF_03818138 | 6.61 | 65  | 22 | 0.820 | 0.001 | False | LSU ribosomal protein L35p                                                              |
| PGF_01135236 | 6.58 | 236 | 22 | 0.428 | 0.144 | False | Dephospho-CoA kinase (EC 2.7.1.24)                                                      |
| PGF_02454577 | 6.58 | 88  | 22 | 0.701 | 0.009 | False | SSU ribosomal protein S20p                                                              |
| PGF_00013347 | 6.46 | 97  | 22 | 0.656 | 0.128 | False | UPF0297 protein YrzL                                                                    |
| PGF_05770273 | 6.41 | 70  | 22 | 0.766 | 0.019 | False | LSU ribosomal protein L31p @ LSU ribosomal protein L31p, zinc-dependent                 |
| PGF_06948903 | 6.40 | 95  | 22 | 0.656 | 0.116 | False | SSU ribosomal protein S18p @ SSU ribosomal protein S18p, zinc-dependent                 |
| PGF_00415631 | 6.32 | 93  | 22 | 0.656 | 0.046 | False | COG2740: Predicted nucleic-acid-binding protein implicated in transcription termination |
| PGF_02899131 | 6.27 | 72  | 22 | 0.739 | 0.037 | False | LSU ribosomal protein L29p (L35e)                                                       |
| PGF_00598888 | 6.19 | 160 | 22 | 0.489 | 0.128 | False | Mini-ribonuclease III                                                                   |
| PGF_00011792 | 5.99 | 127 | 22 | 0.531 | 0.194 | False | His repressor                                                                           |

|              |      |     |    |       |       |       |                                                                         |
|--------------|------|-----|----|-------|-------|-------|-------------------------------------------------------------------------|
| PGF_06609275 | 5.83 | 49  | 22 | 0.833 | 0.000 | False | LSU ribosomal protein L33p @ LSU ribosomal protein L33p, zinc-dependent |
| PGF_04457297 | 5.83 | 209 | 22 | 0.403 | 0.099 | False | 5-formyltetrahydrofolate cyclo-ligase (EC 6.3.3.2)                      |
| PGF_00016424 | 5.73 | 37  | 22 | 0.941 | 0.000 | False | LSU ribosomal protein L36p @ LSU ribosomal protein L36p, zinc-dependent |
| PGF_00016395 | 5.60 | 60  | 22 | 0.724 | 0.020 | False | LSU ribosomal protein L30p (L7e)                                        |
| PGF_00016404 | 5.58 | 62  | 22 | 0.709 | 0.031 | False | LSU ribosomal protein L32p @ LSU ribosomal protein L32p, zinc-dependent |
| PGF_00662997 | 5.44 | 266 | 22 | 0.334 | 0.073 | False | Cobalamin synthase (EC 2.7.8.26)                                        |
| PGF_10450086 | 5.31 | 165 | 22 | 0.414 | 0.161 | False | Transcription termination protein NusB                                  |
| PGF_10097367 | 5.31 | 834 | 22 | 0.184 | 0.623 | False | Porphobilinogen deaminase (EC 2.5.1.61)                                 |
| PGF_06632167 | 5.14 | 128 | 22 | 0.455 | 0.118 | False | Signal recognition particle associated protein                          |
| PGF_08432396 | 4.99 | 445 | 22 | 0.237 | 0.522 | False | Nicotinate-nucleotide adenylyltransferase (EC 2.7.7.18)                 |



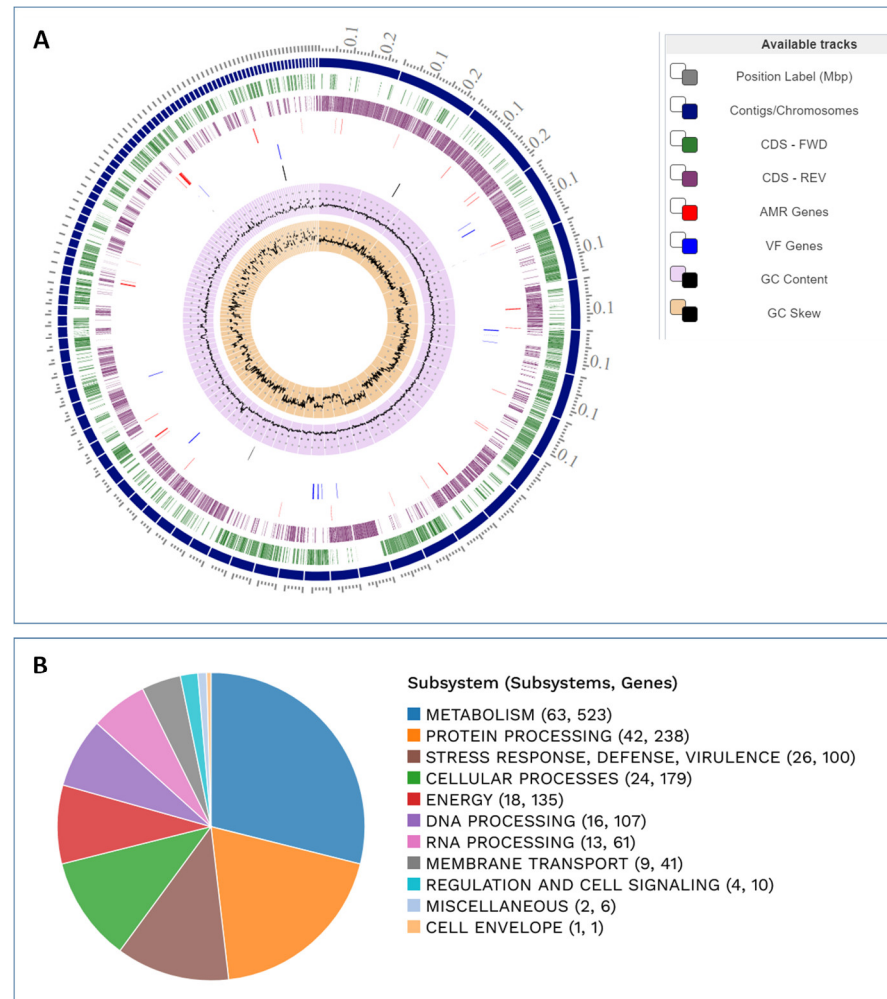

**Figure S1: A:** A circular graphical display of the distribution of the genome annotations in IRMC2505A. **B:** An overview of the subsystems of genes for the genome IRMC2505A.

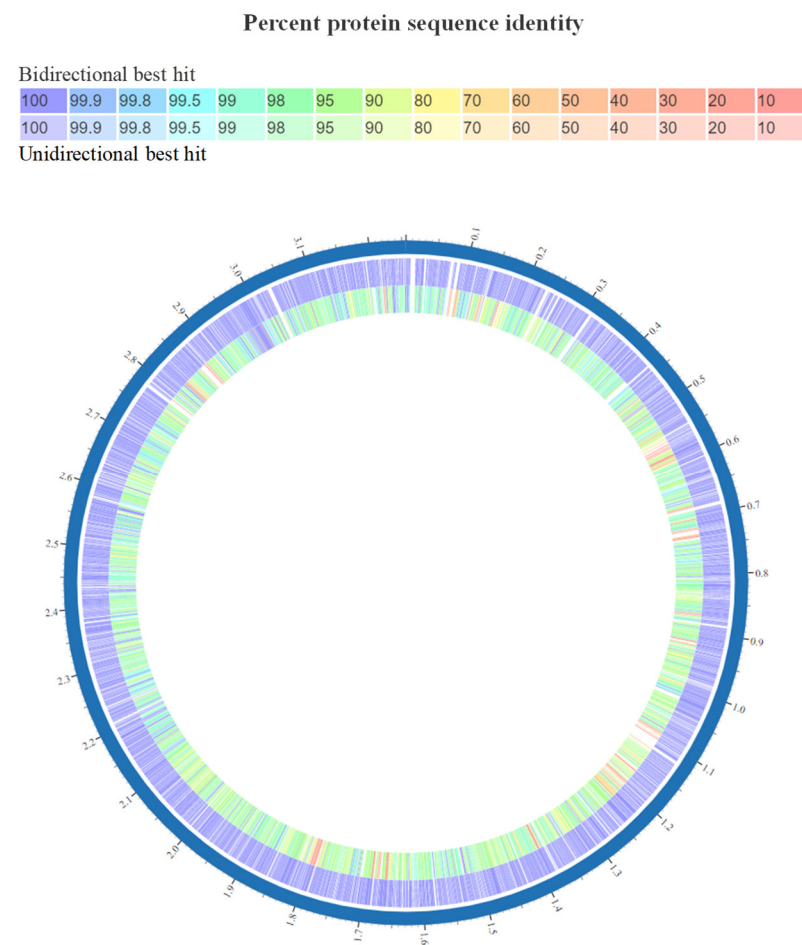

**Figure S2:** Proteome comparison. List of tracks, from outside to inside: *Clostridium perfringens* ATCC 13124 (195103.10) and *Clostridium perfringens* IRMC2505A (1502.2785).
